# Supplementary material for: A novel polyoxochromium borophosphate with new 6-membered ring crown-shaped clusters
Source: Royal Society of Chemistry journal article supplement (doi:10.1039/c000515k), 2010-01-01
Supplement: c000515k.pdf [file c000515k.pdf]

## Electronic Supplementary Information (ESI)

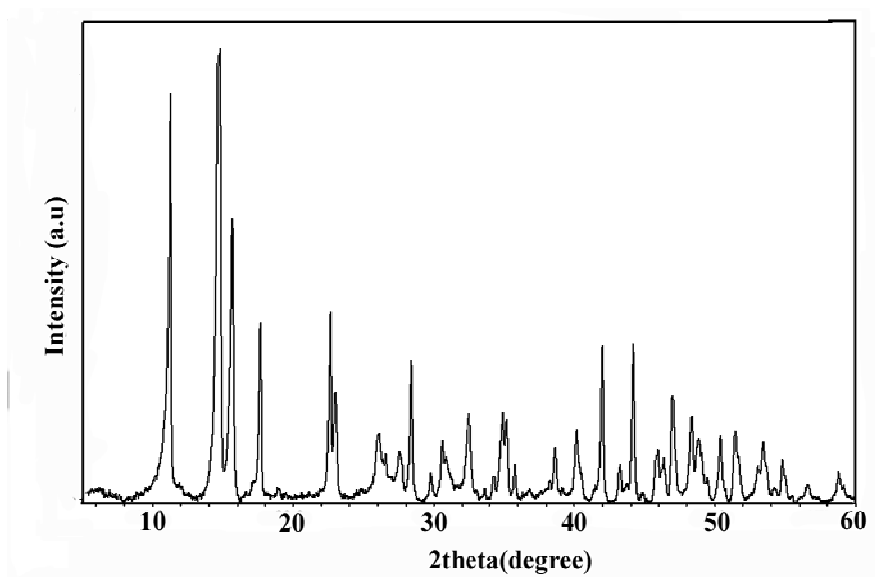

**Fig.S1.** The X-ray diffraction powder pattern of compound (1).

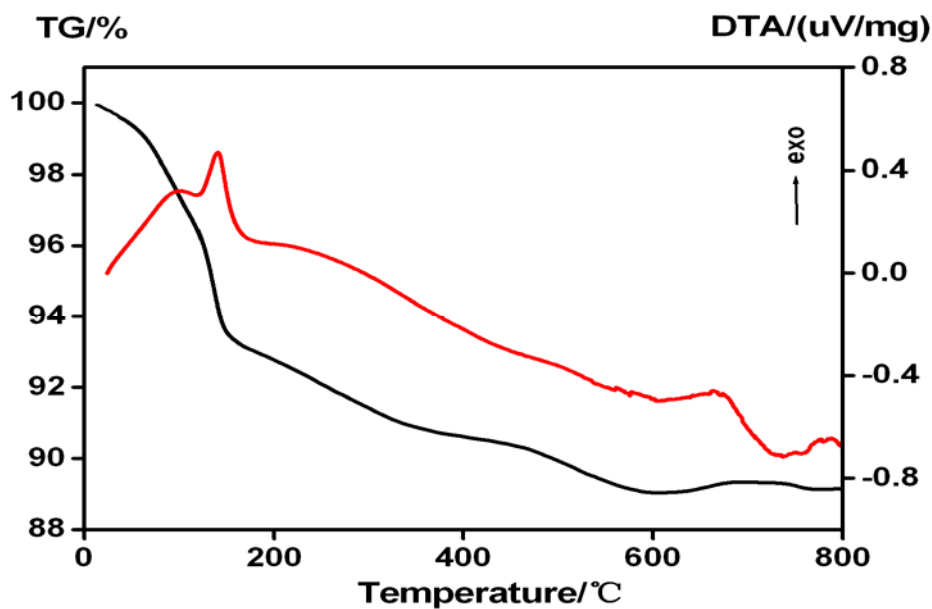

**Fig. S2.** DSC/TG measurement of compound (1).
